# Supplementary material for: PCSK9 Confers Inflammatory Properties to Extracellular Vesicles Released by Vascular Smooth Muscle Cells
Source: MDPI journal article supplement (doi:10.3390/ijms232113065), 2022-10-28
Supplement: s1 [file s1]

Supplemental Figure S1

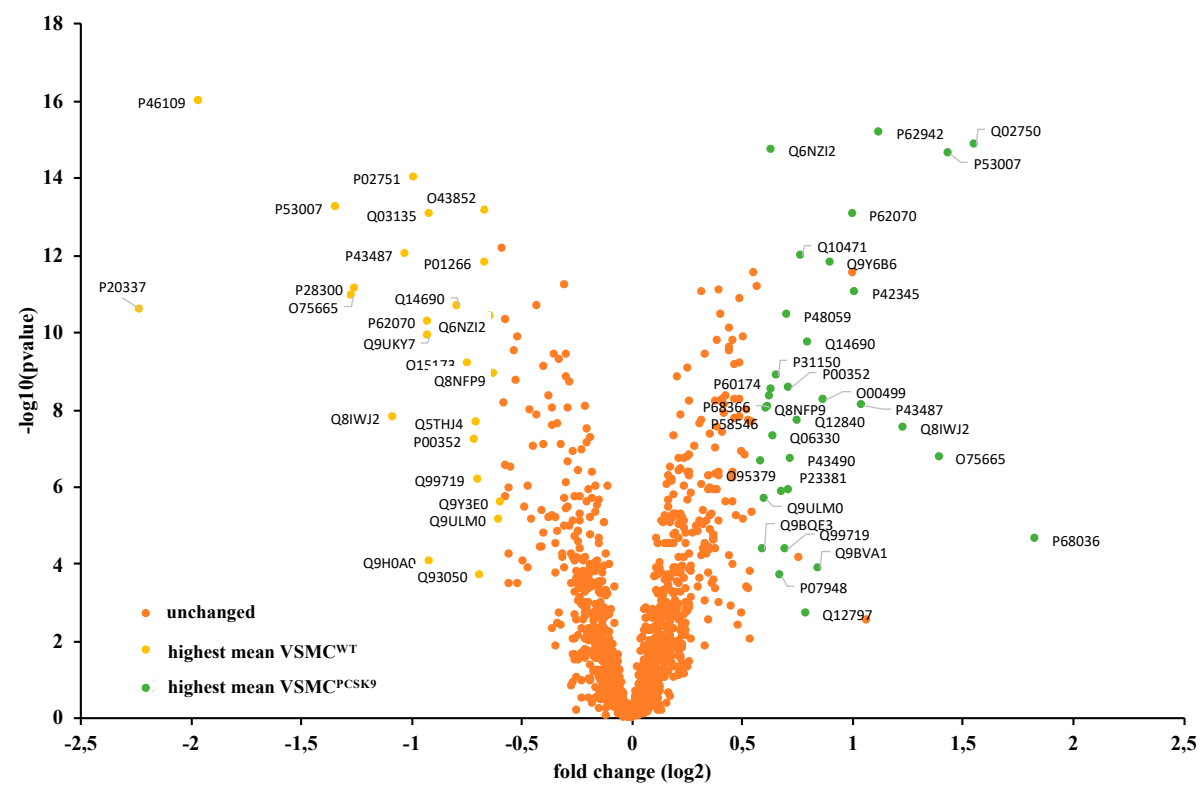

Supplemental Figure S1. Volcano plot of proteins mostly expressed in vascular smooth muscle cells overexpressing PCSK9. PCSK9, proprotein convertase subtilisin/kexin type 9.

## Supplemental Figure S2

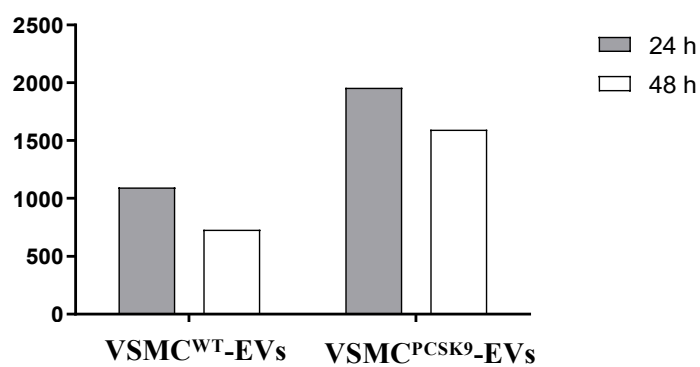

**Supplemental Figure S2.** Time course experiment to assess optimal conditions for EVs isolation. VSMCs were maintained in DMEM. EVs were isolated from the conditioned medium after 24 and 48 hours and then the concentration was assessed by NTA. NTA, nanoparticle tracking analysis; VSMC, vascular smooth muscle cells.

Supplemental Figure S3

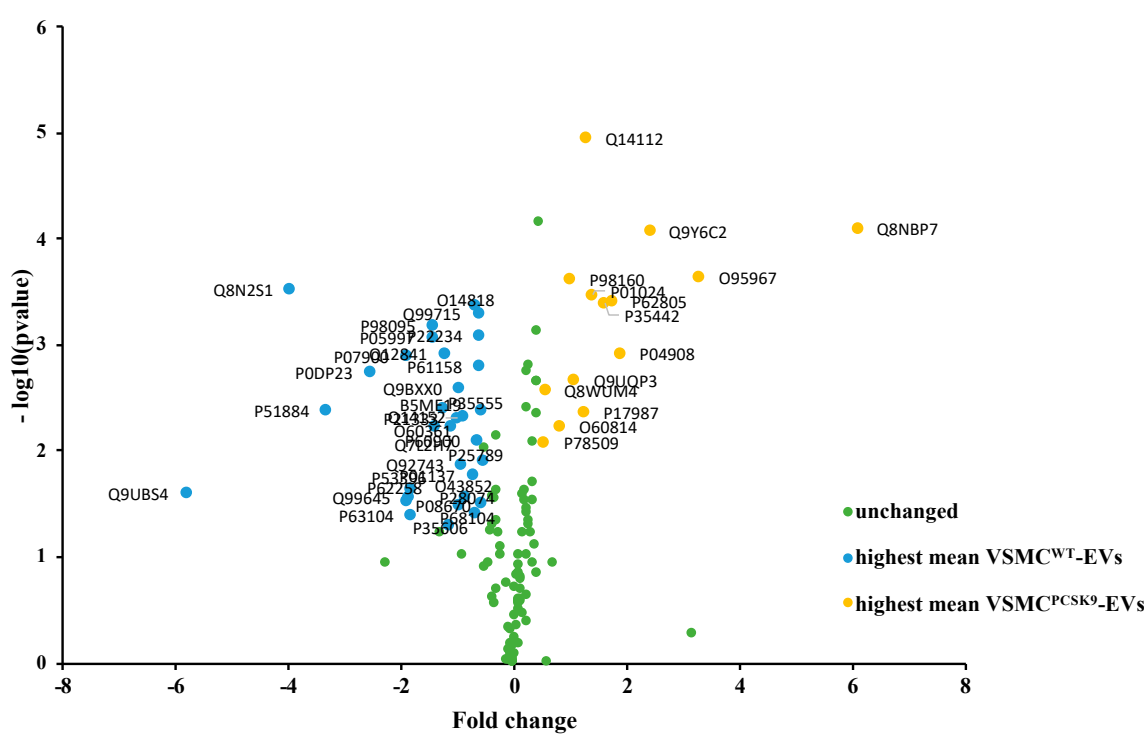

Supplemental Figure S3. Volcano plot of proteins mostly expressed in extracellular vesicles (EVs) released from vascular smooth muscle cells overexpressing PCSK9. PCSK9, proprotein convertase subtilisin/kexin type 9.

**Supplemental Figure S4**

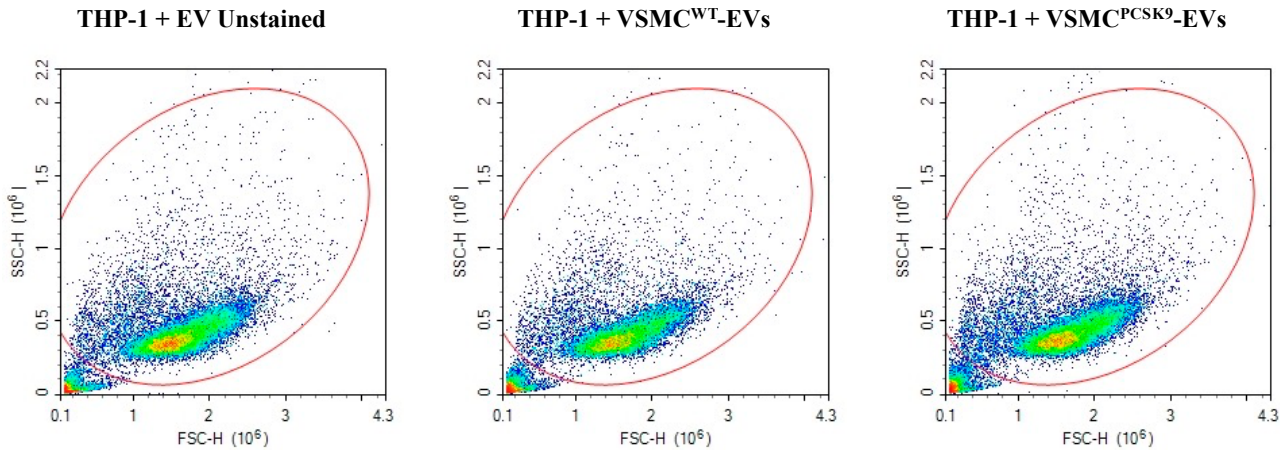

**Supplemental Figure S4.** Dot plot relative to the uptake of VSMCPCSK9-EVs and VSMCWT-EVs by target cells (THP-1) assessed by flow cytometry. VSMC<sup>PCSK9</sup>-EVs, EVs released by VSMCs overexpressing PCSK9; VSMC<sup>WT</sup>-EVs, EVs released by VSMCs wildtype

Supplemental Figure S5

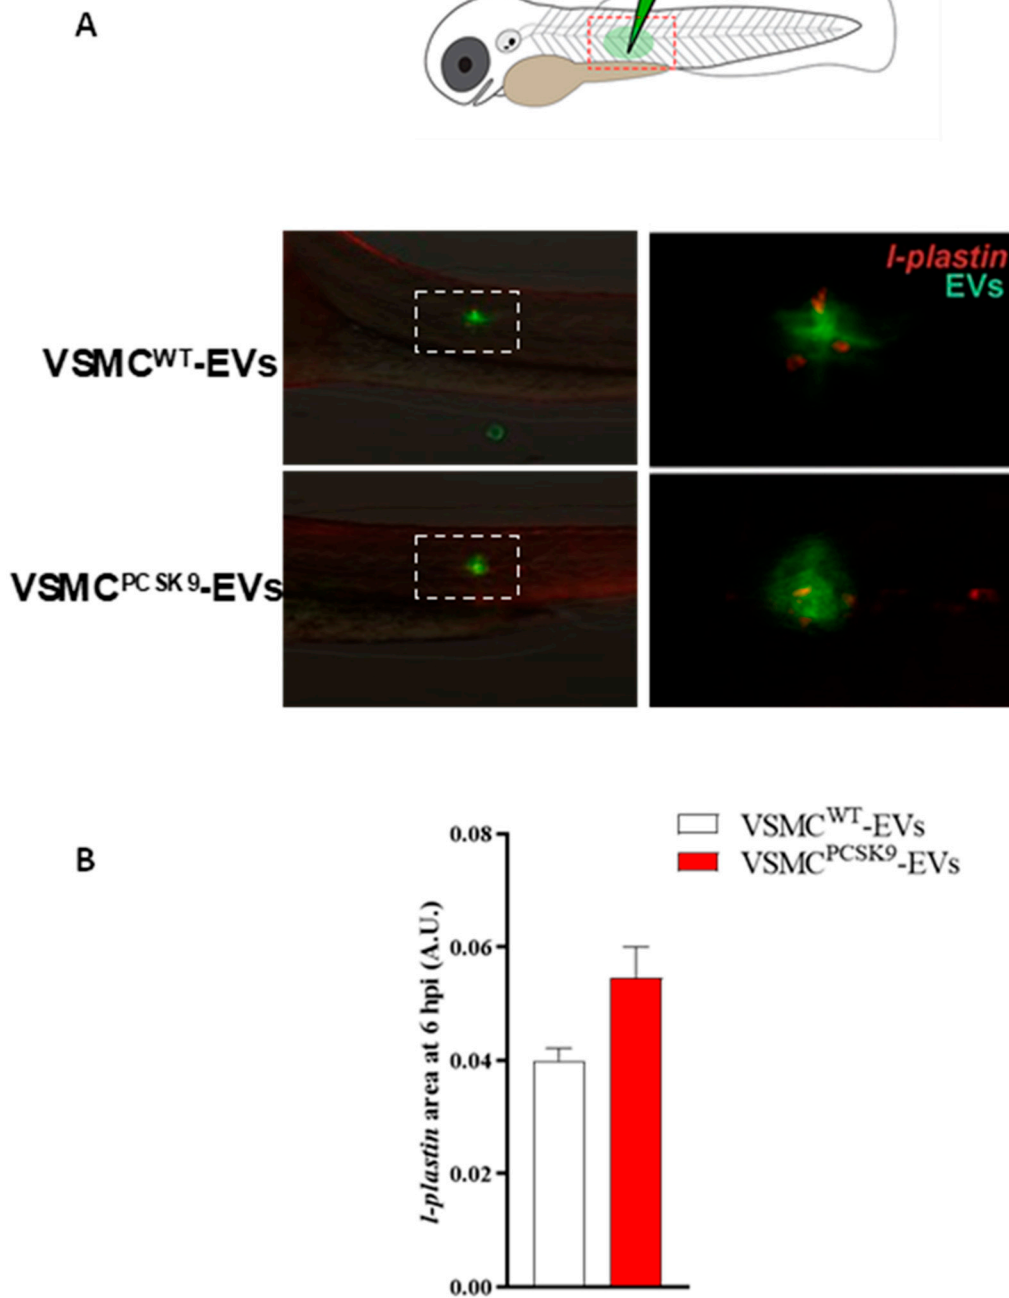

**Supplemental Figure S5. Local microinjection of EVs into embryos of zebrafish.** A) Immuno-detection assay (anti-*l-plastin*) in trunk area (lateral view) of embryos treated with CFSE-stained EVs. A scheme of injection strategy is reported. Representative fluorescence overlaid with brightfield images shows macrophage (red) and EV (green) recruitment at the injection site (dashed line) 6 hpi. B) Macrophage quantification (*l-plastin* positive signal area) in dashed line area at 6 hpi; the mean values of *l-plastin* positive signal area per embryo  $\pm$  SEM are indicated (VSMC<sup>WT</sup>-EVs= 20 and VSMC<sup>PCSK9</sup>-EVs= 16, from three independent biological replicates). Red bar represents the injection of VSMC<sup>PCSK9</sup>-EVs; white bar represents the injection with VSMC<sup>WT</sup>-EVs. Statistical significance was assessed by two-tailed unpaired Student's t test; scale bar 300  $\mu$ m. A.U., arbitrary unit; EVs, extracellular vesicles; hpi, hours post injection; SEM, standard error of the mean; VSMC<sup>PCSK9</sup>-EVs, EVs released by VSMCs overexpressing PCSK9; VSMC<sup>WT</sup>-EVs, EVs released by VSMCs wildtype.

## Supplemental Figure S6

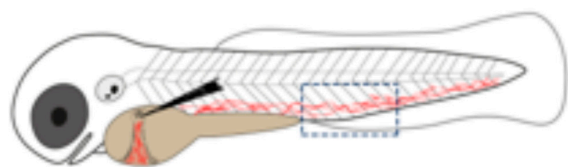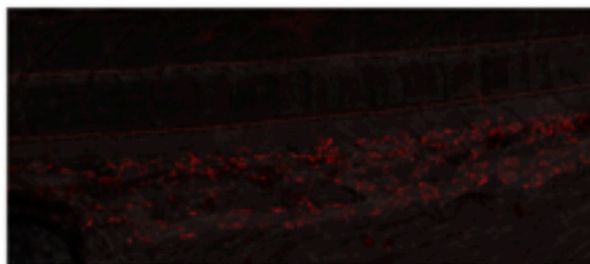

**Supplemental Figure S6.** Biodistribution of EVs stained with sulfo-cyanine 7.5 (red) systematically injected into the caudal region of zebrafish embryos. EVs, extracellular vesicles.

**Supplemental Table S1.** List of primer sequences used for qRT-PCR analysis

|                                 | <i>Forward(5'-3')</i>    | <i>Reverse(5'-3')</i>        |
|---------------------------------|--------------------------|------------------------------|
| <b>Cell culture</b>             |                          |                              |
| <b>IL-1<math>\alpha</math></b>  | GTAGCAACCAACGGGAAGGT     | AAGGTGCTGACCTAGGCTTG         |
| <b>IL-1<math>\beta</math></b>   | TACCTGTCCTGCGTGTTGAA     | TCTTTGGGTAATTTTGGGATCT       |
| <b>IL-6</b>                     | ACCCCCAGGAGAAGATTCCA     | GGTTGTTTTCTGCCAGTGCC         |
| <b>CCL2</b>                     | AGCCACCTTCATTCCCCAAG     | CTCCTTGGCCACAATGGTCT         |
| <b>IL-8</b>                     | GAGCACTCCATAAGGCACAAA    | ATGGTTCCTTCCGGTGGT           |
| <b>ET-1</b>                     | AGAGTGTGTCTACTTCTGCCA    | CTTCCAAGTCCATACGGAACAA       |
| <b>ICAM-1</b>                   | CTCCAATGTGCCAGGCTTG      | CAGTGGGAAAGTGCCATCCT         |
| <b>VCAM-1</b>                   | TTCCCTAGAGATCCAGAAATCGAG | CTTGCAGCTTACAGTGACAGAGC      |
| <b>18S</b>                      | CGGCTACCACATCCAAGGAA     | CCTGTATTGTTATTTTTCGTCACTACCT |
| <b>36B4</b>                     | CCACGCTGCTGAACATGC       | TCGAACACCTGCTGATGAC          |
| <b>Zebrafish</b>                |                          |                              |
| <b>Rpl8</b>                     | CTCCGTCTTCAAAGCCCATGT    | TCCTTCACGATCCCCTTGATG        |
| <b><math>\beta</math>-actin</b> | GCACGAGAGATCTTCACTCC     | GCAGCGATTTCCTCATCCAT         |
| <b>IL-16</b>                    | TGGACTTCGCAGCACAAAATG    | CGTTCACTTCACGCTCTTGGATG      |
| <b>CXCL8</b>                    | CGACGCATTGGAAAACACAT     | TGTCATCAAGGTGGCAATGA         |

IL-1 $\alpha$ = Interleukin-1 $\alpha$ ; IL-1 $\beta$ = Interleukin-1 $\beta$ ; IL-6= Interleukin-6; CCL2= C-C motif chemokine ligand 2;

IL-8= Interleukin-8; ET-1= Endothelin 1; ICAM-1= Intercellular adhesion molecule 1;

VCAM-1= Vascular cell adhesion molecule 1; Rpl8= 60S ribosomal protein L8;

IL-16= Interleukin-16; CXCL8= C-X-C Motif Chemokine Ligand 8.

**Supplemental Table S2.** List of primary antibodies used for western blot and immunofluorescence analyses

| <i>Primary antibodies</i>                                 | <i>Dilution</i> |
|-----------------------------------------------------------|-----------------|
| <i>Alix (Abcam, Cambridge, UK)</i>                        | 1:1000          |
| <i>β1-Integrin (Abcam, Cambridge, UK)</i>                 | 1:1000          |
| <i>β-Actin (Santa Cruz Biotechnology, Santa Cruz, CA)</i> | 1:1000          |
| <i>CD36 (Proteintech, Manchester, UK)</i>                 | 1:2000          |
| <i>PCSK9 (Genetex, Irvine, CA)</i>                        | 1:1000          |
| <i>pSTAT3 (Abcam, Cambridge, UK)</i>                      | 1:10,000        |
| <i>SOCS3 (Proteintech, Manchester, UK)</i>                | 1:1000          |
| <i>Vinculin (Genetex, Irvine, CA)</i>                     | 1:1000          |
| <i>LCPI (Genetex, Irvine, CA)</i>                         | 1:200           |

CD36= Cluster of differentiation 36; PCSK9= Proprotein convertase subtilisin/kexin type 9; pSTAT3= phospho-Signal Transducer And Activator Of Transcription 3; SOCS3= Suppressor of Cytokine Signaling 3; LCP1= L-Plastin.



**Supplemental Table S3.** Gene Ontology (GO) enrichment analysis performed on the 33 proteins with the highest expression in VSMCs<sup>PCSK9</sup>

| <i>GO:term</i> | <i>Description</i>                                                                                         | <i>FDR</i> |
|----------------|------------------------------------------------------------------------------------------------------------|------------|
| GO:0006096     | Glycolytic process                                                                                         | 0.00023    |
| GO:0019674     | NAD metabolic process                                                                                      | 0.00023    |
| GO:0032386     | Regulation of intracellular transport                                                                      | 0.00032    |
| GO:0061621     | Canonical glycolysis                                                                                       | 0.00032    |
| GO:0006091     | Generation of precursor metabolites and energy                                                             | 0.00043    |
| GO:0055114     | Oxidation-reduction process                                                                                | 0.00043    |
| GO:0051640     | Organelle localization                                                                                     | 0.00064    |
| GO:0006094     | Gluconeogenesis                                                                                            | 0.0012     |
| GO:0046034     | ATP metabolic process                                                                                      | 0.0012     |
| GO:0016051     | Carbohydrate biosynthetic process                                                                          | 0.0017     |
| GO:0051656     | Establishment of organelle localization                                                                    | 0.0026     |
| GO:0051128     | Regulation of cellular component organization                                                              | 0.0039     |
| GO:0010770     | Positive regulation of cell morphogenesis involved in differentiation                                      | 0.0046     |
| GO:0060341     | Regulation of cellular localization                                                                        | 0.0046     |
| GO:0022603     | Regulation of anatomical structure morphogenesis                                                           | 0.0076     |
| GO:0051234     | Establishment of localization                                                                              | 0.0083     |
| GO:0051179     | Localization                                                                                               | 0.017      |
| GO:0090170     | Regulation of Golgi inheritance                                                                            | 0.017      |
| GO:0099637     | Neurotransmitter receptor transport                                                                        | 0.017      |
| GO:0048489     | Synaptic vesicle transport                                                                                 | 0.0186     |
| GO:0006810     | Transport                                                                                                  | 0.0194     |
| GO:0010720     | Positive regulation of cell development                                                                    | 0.0194     |
| GO:0045597     | Positive regulation of cell differentiation                                                                | 0.0194     |
| GO:0048699     | Generation of neurons                                                                                      | 0.021      |
| GO:0032502     | Developmental process                                                                                      | 0.0277     |
| GO:0009117     | Nucleotide metabolic process                                                                               | 0.0313     |
| GO:0016185     | Synaptic vesicle budding from presynaptic endocytic zone membrane                                          | 0.0313     |
| GO:0050793     | Regulation of developmental process                                                                        | 0.0348     |
| GO:0019682     | glyceraldehyde-3-phosphate metabolic process                                                               | 0.0354     |
| GO:0098884     | Postsynaptic neurotransmitter receptor internalization                                                     | 0.0354     |
| GO:0030388     | Fructose 1,6-bisphosphate metabolic process                                                                | 0.041      |
| GO:0007399     | Nervous system development                                                                                 | 0.0424     |
| GO:0051649     | Establishment of localization in cell                                                                      | 0.0424     |
| GO:0005975     | Carbohydrate metabolic process                                                                             | 0.0437     |
| GO:0032879     | Regulation of localization                                                                                 | 0.0437     |
| GO:0050790     | Regulation of catalytic activity                                                                           | 0.0437     |
| GO:1902959     | Regulation of aspartic-type endopeptidase activity involved in amyloid precursor protein catabolic process | 0.0437     |
| GO:0042221     | Response to chemical                                                                                       | 0.0447     |
| GO:0051049     | Regulation of transport                                                                                    | 0.0471     |
| GO:0071496     | Cellular response to external stimulus                                                                     | 0.0477     |
| GO:1903800     | Positive regulation of production of miRNAs involved in gene silencing by miRNA                            | 0.0477     |

|            |                                                        |        |
|------------|--------------------------------------------------------|--------|
| GO:0051130 | Positive regulation of cellular component organization | 0.0495 |
| GO:1903034 | Regulation of response to wounding                     | 0.0495 |
| GO:0016192 | Vesicle-mediated transport                             | 0.0498 |
| GO:0022604 | Regulation of cell morphogenesis                       | 0.0498 |

**Supplemental Table S4.** Gene Ontology (GO) enrichment analysis on the 14 proteins with the highest expression in EVs<sup>PCSK9</sup>.

| <i>GO term ID</i> | <i>Description</i>                                     | <i>FDR &lt; 0.05</i> |
|-------------------|--------------------------------------------------------|----------------------|
|                   |                                                        |                      |
| GO:0005201        | Extracellular matrix structural constituent            | 0.0038               |
| GO:0070325        | Lipoprotein particle receptor binding                  | 0.0038               |
| GO:0070326        | Very-low-density lipoprotein particle receptor binding | 0.0077               |
| GO:0005102        | Signaling receptor binding                             | 0.0380               |

**Supplemental Table S5.** Gene targets associated with inflammation and atherosclerosis.

| <i>Gene</i> | <i>miRNA</i>                    |
|-------------|---------------------------------|
| ACKR1       | hsa-miR-34c-5p                  |
| ADIPOR1     | hsa-miR-221-3p                  |
| ADIPOR2     | hsa-miR-34c-5p                  |
| AGTR1       | hsa-miR-34c-5p                  |
| ALOX5       | hsa-miR-29a-5p                  |
| ANXA1       | hsa-miR-221-3p                  |
| APLN        | hsa-miR-497-5p                  |
| APP         | hsa-miR-497-5p                  |
| BDNF        | hsa-miR-497-5p                  |
| CCR7        | hsa-miR-125b-5p                 |
| CD163       | hsa-miR-497-5p                  |
| CD28        | hsa-miR-497-5p                  |
| CD40        | hsa-miR-497-5p                  |
| CD47        | hsa-miR-497-5p, hsa-miR-34c-5p  |
| CNR1        | hsa-miR-221-3p                  |
| CSF1        | hsa-miR-497-5p                  |
| CTNNB1      | hsa-miR-148b-5p                 |
| CTSB        | hsa-miR-34c-5p                  |
| CX3CL1      | hsa-miR-497-5p                  |
| CXCL12      | hsa-miR-221-3p                  |
| CXCL16      | hsa-miR-34c-5p                  |
| DLL4        | hsa-miR-497-5p                  |
| EDN1        | hsa-miR-125b-5p                 |
| EFNB1       | hsa-miR-34c-5p                  |
| EPO         | hsa-miR-125b-5p                 |
| FCGR3A      | hsa-miR-148b-5p                 |
| FGF1        | hsa-miR-497-5p                  |
| FGF2        | hsa-miR-497-5p                  |
| FOXP3       | hsa-miR-34c-5p                  |
| IFNG        | hsa-miR-125b-5p                 |
| IL13        | hsa-miR-125b-5p                 |
| IL15        | hsa-miR-148b-5p, hsa-miR-497-5p |
| IL20        | hsa-miR-497-5p                  |
| LIF         | hsa-miR-125b-5p                 |
| MAPK14      | hsa-miR-125b-5p                 |
| NRG1        | hsa-miR-221-3p                  |
| PCSK1       | hsa-miR-29a-5p                  |
| PDGFA       | hsa-miR-221-3p                  |
| PGF         | hsa-miR-34c-5p                  |
| PLA2G6      | hsa-miR-34c-5p                  |
| PTEN        | hsa-miR-497-5p                  |
| PTPN1       | hsa-miR-125b-5p                 |

|          |                 |
|----------|-----------------|
| SAA1     | hsa-miR-125b-5p |
| SERPINE1 | hsa-miR-34c-5p  |
| SIRT1    | hsa-miR-34c-5p  |
| SMAD3    | hsa-miR-497-5p  |
| SMAD7    | hsa-miR-497-5p  |
| STAT3    | hsa-miR-125b-5p |
| TFRC     | hsa-miR-497-5p  |
| THBD     | hsa-miR-34c-5p  |
| TNFSF13B | hsa-miR-497-5p  |
| TP73     | hsa-miR-125b-5p |
| VEGFA    | hsa-miR-497-5p  |
| WDR1     | hsa-miR-125b-5p |

**Supplemental Table S6.** List of differentially expressed proteins in the secretome of THP-1 exposed to EVs<sup>PCSK9</sup>

| <i>Accession</i> | <i>Description</i>                                     | <i>Peptide count</i> | <i>Unique peptides</i> | <i>Confidence score</i> | <i>p value</i> | <i>Max fold change</i> |
|------------------|--------------------------------------------------------|----------------------|------------------------|-------------------------|----------------|------------------------|
| <i>P50552</i>    | Vasodilator-stimulated<br>phosphoprotein               | 7                    | 6                      | 44.2                    | 8.76E-07       | 2.00                   |
| <i>P10145</i>    | Interleukin-8                                          | 4                    | 4                      | 48.8                    | 6.19E-04       | 1.64                   |
| <i>P09972</i>    | Fructose-bisphosphate aldolase C                       | 9                    | 4                      | 108.1                   | 1.08E-05       | 1.54                   |
| <i>O94804</i>    | Serine/threonine-protein kinase 10                     | 3                    | 2                      | 16.8                    | 1.88E-02       | 1.54                   |
| <i>P09341</i>    | Growth-regulated alpha protein                         | 4                    | 3                      | 30.9                    | 2.04E-03       | 1.54                   |
| <i>P29966</i>    | Myristoylated alanine-rich C-kinase<br>substrate       | 12                   | 10                     | 102.4                   | 6.43E-03       | 1.52                   |
| <i>Q9H3K6</i>    | BolA-like protein 2                                    | 2                    | 2                      | 14.4                    | 5.25E-04       | 1.47                   |
| <i>P30405</i>    | Peptidyl-prolyl cis-trans isomerase F<br>mitochondrial | 4                    | 2                      | 29.4                    | 2.00E-04       | 1.46                   |
| <i>P04083</i>    | Annexin A1                                             | 5                    | 5                      | 43.4                    | 2.90E-03       | 1.46                   |
| <i>O00764</i>    | Pyridoxal kinase                                       | 5                    | 5                      | 50.2                    | 3.67E-03       | 1.36                   |
| <i>P61077</i>    | Ubiquitin-conjugating enzyme E2 D3                     | 3                    | 3                      | 21.3                    | 4.93E-03       | 1.32                   |
| <i>Q15942</i>    | Zyxin                                                  | 5                    | 5                      | 34.2                    | 7.03E-04       | 1.31                   |

|               |                                                 |    |    |       |          |      |
|---------------|-------------------------------------------------|----|----|-------|----------|------|
| <i>P51991</i> | Heterogeneous nuclear<br>ribonucleoprotein A3   | 10 | 6  | 85.6  | 1.05E-04 | 1.30 |
| <i>Q15366</i> | Poly(rC)-binding protein 2                      | 4  | 2  | 29.4  | 1.15E-03 | 1.29 |
| <i>Q9BWD1</i> | Acetyl-CoA acetyltransferase<br>cytosolic       | 9  | 8  | 58.5  | 7.76E-04 | 1.27 |
| <i>Q16658</i> | <i>Fascin</i>                                   | 25 | 24 | 259.6 | 3.50E-03 | 1.26 |
| <i>P01034</i> | <i>Cystatin-C</i>                               | 9  | 8  | 109.4 | 3.78E-05 | 1.26 |
| <i>Q16719</i> | <i>Kynureninase</i>                             | 8  | 7  | 65.1  | 2.94E-03 | 1.26 |
| <i>P06396</i> | <i>Gelsolin</i>                                 | 31 | 12 | 303.7 | 1.50E-02 | 1.26 |
| <i>P09382</i> | <i>Galectin-1</i>                               | 9  | 9  | 110.6 | 8.36E-03 | 1.24 |
| <i>P54578</i> | <i>Ubiquitin carboxyl-terminal hydrolase 14</i> | 2  | 2  | 10.9  | 8.39E-03 | 1.24 |
| <i>O00244</i> | <i>Copper transport protein Atox1</i>           | 2  | 2  | 22.7  | 1.06E-02 | 1.24 |
| <i>P61088</i> | <i>Ubiquitin-conjugating enzyme E2 N</i>        | 6  | 5  | 55.1  | 1.15E-03 | 1.24 |
| <i>Q15181</i> | <i>Inorganic pyrophosphatase</i>                | 12 | 11 | 108.3 | 8.68E-04 | 1.23 |
| <i>Q16555</i> | <i>Dihydropyrimidinase-related protein 2</i>    | 17 | 13 | 146.8 | 1.29E-02 | 1.20 |

---

**Supplemental Table S7.** Gene Ontology (GO) enrichment analysis on the 25 proteins with the highest expression in the secretome of THP-1 exposed to EVs<sup>PCSK9</sup>.

| <i>GO term ID</i> | <i>Description</i>                               | <i>FDR &lt; 0.05</i> |
|-------------------|--------------------------------------------------|----------------------|
| GO:0006955        | Immune response                                  | 0.00018              |
| GO:0002376        | Immune system process                            | 0.0021               |
| GO:0045321        | Leukocyte activation                             | 0.0056               |
| GO:0006950        | Response to stress                               | 0.0074               |
| GO:0030036        | Actin cytoskeleton organization                  | 0.0074               |
| GO:0034097        | Response to cytokine                             | 0.0074               |
| GO:0042119        | Neutrophil activation                            | 0.0074               |
| GO:0002366        | Leukocyte activation involved in immune response | 0.011                |
| GO:0010638        | Positive regulation of organelle organization    | 0.011                |
| GO:0050896        | Response to stimulus                             | 0.0118               |
| GO:0007015        | Actin filament organization                      | 0.0134               |
| GO:0002252        | Immune effector process                          | 0.0142               |
| GO:0006952        | Defense response                                 | 0.0142               |
| GO:0043312        | Neutrophil degranulation                         | 0.017                |
| GO:0052372        | Modulation by symbiont of entry into host        | 0.017                |
| GO:0071345        | Cellular response to cytokine stimulus           | 0.017                |
| GO:0097435        | Supramolecular fiber organization                | 0.017                |
| GO:0042221        | Response to chemical                             | 0.0227               |
| GO:0007010        | Cytoskeleton organization                        | 0.024                |
| GO:0009605        | Response to external stimulus                    | 0.024                |
| GO:0051017        | Actin filament bundle assembly                   | 0.024                |
| GO:0070887        | Cellular response to chemical stimulus           | 0.0369               |
| GO:0070301        | Cellular response to hydrogen peroxide           | 0.0424               |
| GO:0051707        | Response to other organism                       | 0.0433               |
